# Supplementary material
Source: Springer Nature journal article supplement (https://www.springermedizin.de/resource/supplementary/12889_2011_4120_MOESM1_ESM.pdf/9491716)

**Human biomass due to BMI>30  
(Countries with more than 1% of human biomass due to BMI>30)**

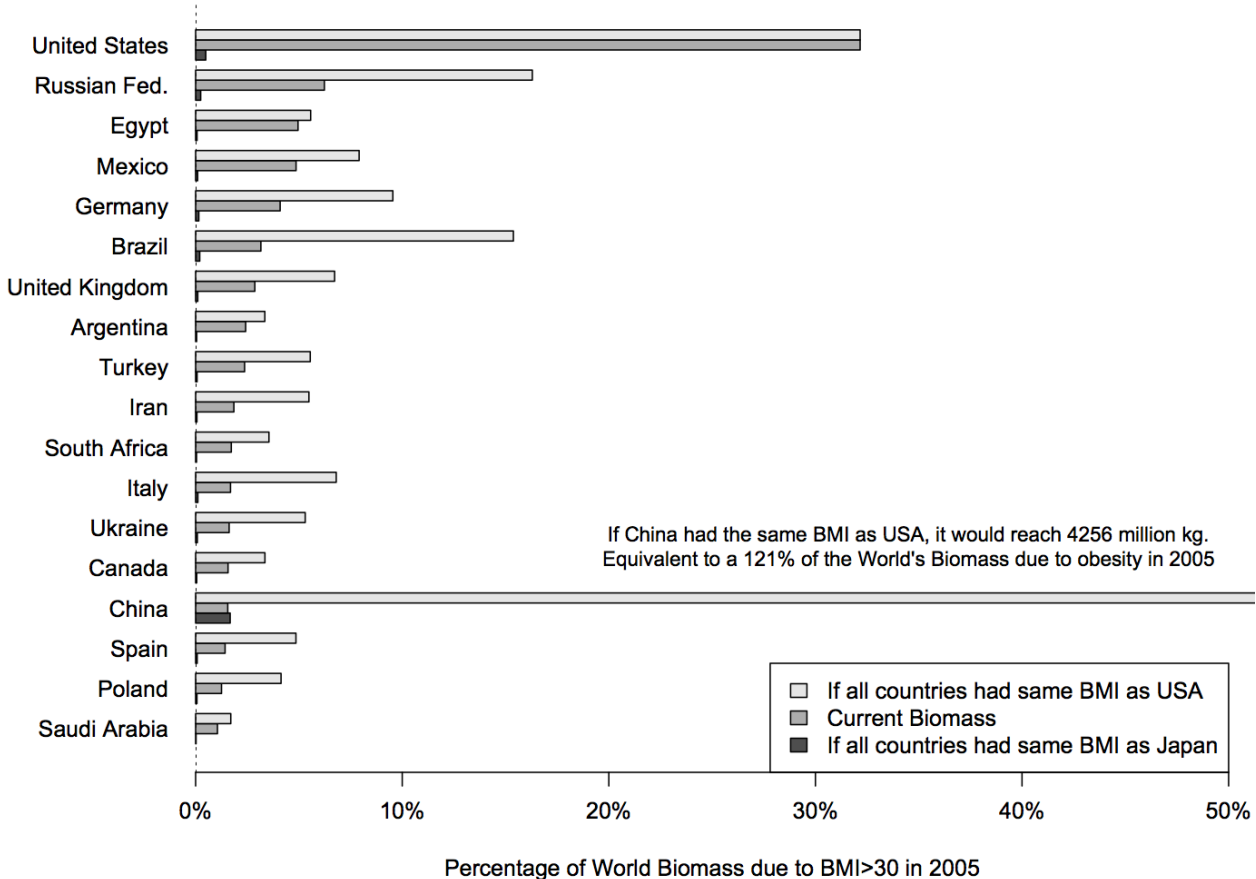

Supplement: MOESM1 [file 9491716]
